# Supplementary material for: Spontaneous and reversible spin-splitting in ferroelectric A-type antiferromagnetism
Source: Royal Society of Chemistry journal article supplement (doi:10.1039/d4tc00899e), 2024-01-01
Supplement: d4tc00899e1.pdf [file d4tc00899e1.pdf]

## Spontaneous and reversible spin-splitting in ferroelectric A-type antiferromagnetism

Liguo Zhang<sup>1</sup>, San-Dong Guo<sup>1</sup> and Guangzhao Wang<sup>2</sup>

*School of Electronic Engineering, Xi'an University of Posts and Telecommunications, Xi'an 710121, China and*

*<sup>2</sup>Key Laboratory of Extraordinary Bond Engineering and Advanced Materials Technology of Chongqing,  
School of Electronic Information Engineering, Yangtze Normal University, Chongqing 408100, China*

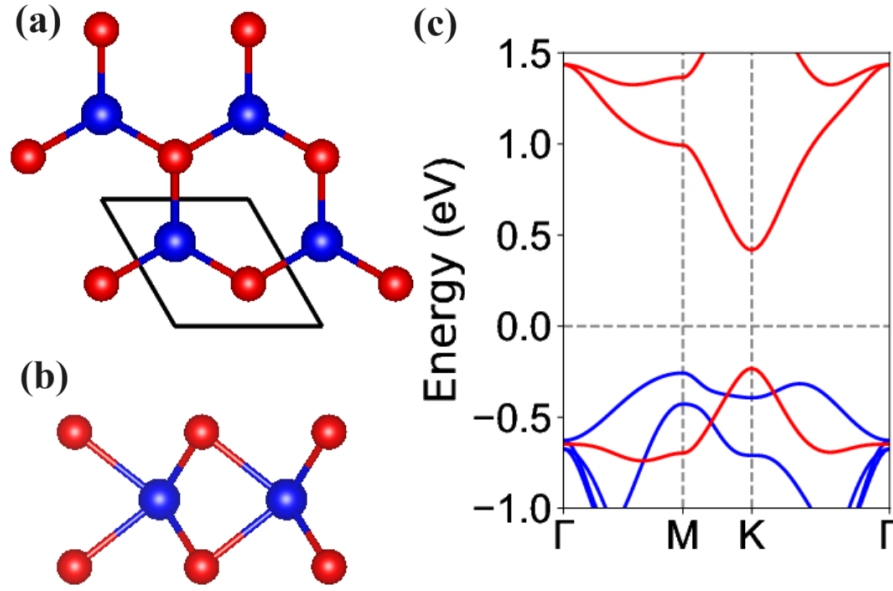

FIG. S1. (Color online) The crystal structures [top (a) and side (b) views] and energy band structures (c) of  $\text{RuBr}_2$  monolayer. In (a) and (c), the red and blue balls represent the Br and Ru atoms, respectively. In (c), the spin-up and spin-down channels are depicted in blue and red.

```

AB-bilayer
1.0000000000000000
 3.7201954241226112  0.0000000000000000  0.0000000000000000
-1.8600977120613065  3.2217837443291479  0.0000000000000000
 0.0000000000000000  0.0000000000000000  30.6650009154999985
 Ru  Br
  2   4
Direct
 0.3333333510000003  0.6666667029999971  0.3360424894657825
 0.6666667080000011  0.3333333510000003  0.5518023240120229
 0.6666667080000011  0.3333333510000003  0.2794211628649776
 0.6666667080000011  0.3333333510000003  0.3924082600640446
 0.0000000000000000  0.0000000000000000  0.4954233696609478
 0.0000000000000000  0.0000000000000000  0.6084124249322329
monolayer
1.0000000000000000
 3.7547373710534355  0.000000000110835  0.0000000000000000
-1.8773686854584519  3.2516979478349852  0.0000000000000000
 0.0000000000000000  0.0000000000000000  24.6439990997000002
 Ru  Br
  1   2
Direct
 0.333329860000021  0.6666669849999991  0.0000000000000000
 0.6666669849999991  0.333329860000021  0.9300872592475296
 0.6666669849999991  0.333329860000021  0.0699127407524706

```

FIG. S2. (Color online) The POSCAR of  $\text{RuBr}_2$  bilayer and monolayer.

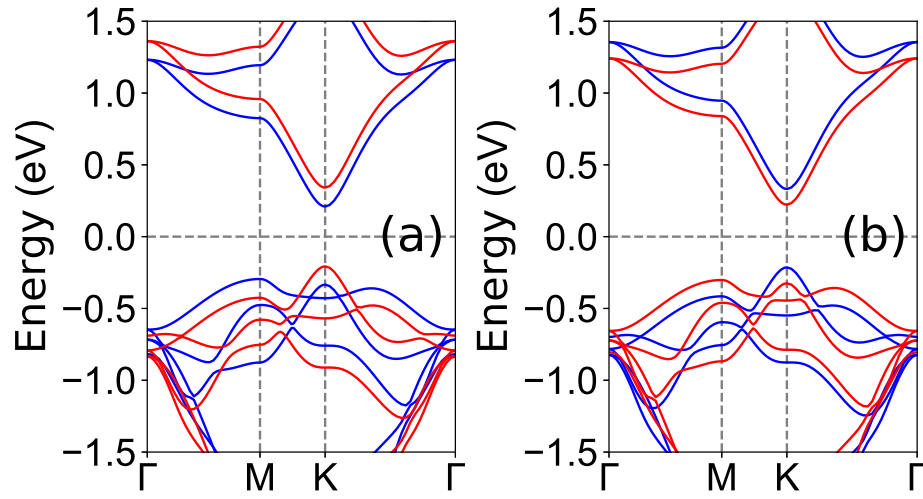

FIG. S3. (Color online) The energy band structures of AB-stacked RuBr<sub>2</sub> bilayer with electric field +0.10 V/Å (a) and -0.10 V/Å (b). The spin-up and spin-down channels are depicted in blue and red.

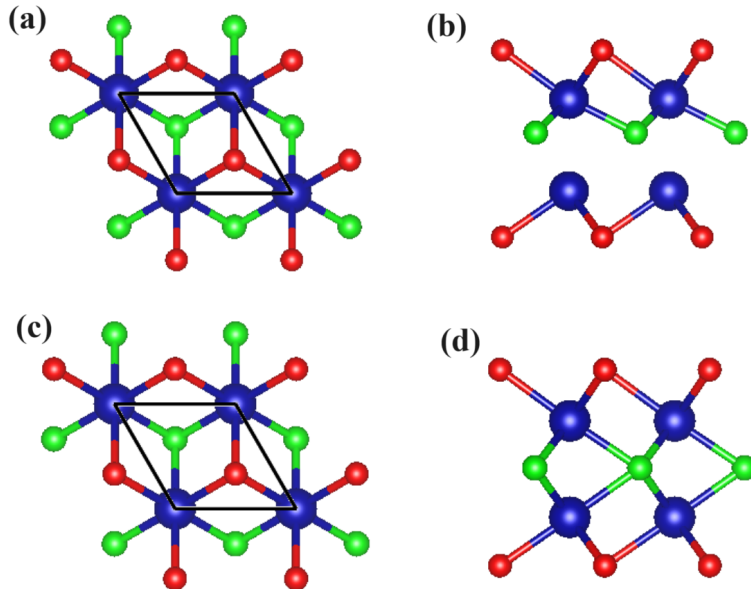

FIG. S4. (Color online) The crystal structures [top (a,c) and side (b,d) views] of Co<sub>2</sub>CF<sub>2</sub> monolayer with H' (a,b) and H (c,d) phases. The red, blue and green balls represent the F, Co and C atoms, respectively.

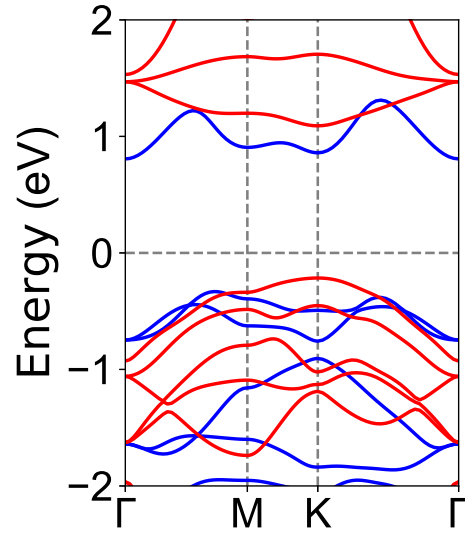

FIG. S5. (Color online) The energy band structures of  $\text{Co}_2\text{CF}_2$  monolayer with  $\text{H}'$  phase. The spin-up and spin-down channels are depicted in blue and red.

```

AC
  1.00000000000000
  2.8688034880388176  0.0000000000000000  0.0000000000000000
 -1.4344017440688628  2.4844566990685766  0.0000000000000000
  0.0000000000000000  0.0000000000000000  32.2830009460000014
  C      F      Co
  2      4      4
Direct
  0.333333380000028  0.666666675000019  0.5858887893138416
  0.0000000000000000  0.0000000000000000  0.8111833089361653
  0.333333380000028  0.666666675000019  0.7306364070679621
  0.333333380000028  0.666666675000019  0.8751821804037121
  0.666666690000014  0.333333380000028  0.5052370144777427
  0.666666690000014  0.333333380000028  0.6501866095546376
  0.666666690000014  0.333333380000028  0.7662186000198830
  0.666666690000014  0.333333380000028  0.8372825761417388
  0.0000000000000000  0.0000000000000000  0.5409922390746544
  0.0000000000000000  0.0000000000000000  0.6121823600096548
.....
AB
  1.00000000000000
  2.8688034880388176  0.0000000000000000  0.0000000000000000
 -1.4344017440688628  2.4844566990685766  0.0000000000000000
  0.0000000000000000  0.0000000000000000  32.2830009460000014
  C      F      Co
  2      4      4
Direct
  0.333333380000028  0.666666675000019  0.4141100000000009
  0.0000000000000000  0.0000000000000000  0.1888199999999998
  0.333333380000028  0.666666675000019  0.2693599999999998
  0.333333380000028  0.666666675000019  0.1248199999999997
  0.666666690000014  0.333333380000028  0.4947599999999994
  0.666666690000014  0.333333380000028  0.3498099999999998
  0.666666690000014  0.333333380000028  0.2337800000000030
  0.666666690000014  0.333333380000028  0.1627200000000002
  0.0000000000000000  0.0000000000000000  0.4590099999999993
  0.0000000000000000  0.0000000000000000  0.3878199999999997

```

FIG. S6. (Color online) The POSCAR of  $\text{H}'\text{-Co}_2\text{CF}_2$  bilayer systems with AC and AB patterns.

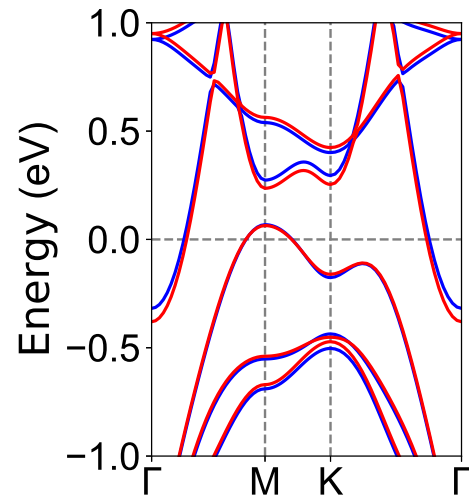

FIG. S7. (Color online) The energy band structures of bilayer  $\text{Co}_2\text{CF}_2$ , where the C atoms of AC pattern are artificially moved on the central horizontal plane of Co dimers. The spin-up and spin-down channels are depicted in blue and red.
